# Supplementary material for: Neural Differentiation Is Inhibited through HIF1α/β-Catenin Signaling in Embryoid Bodies
Source: Hindawi journal article supplement (doi:10.1155/2017/8715798), 2017-01-01

Supplementary figures

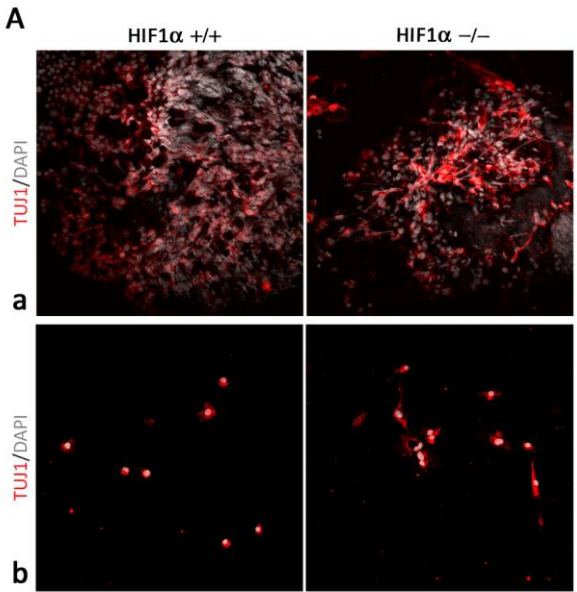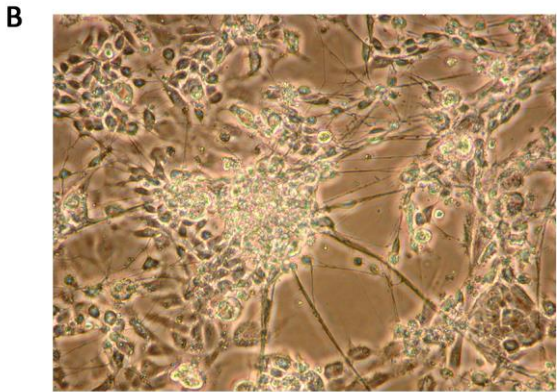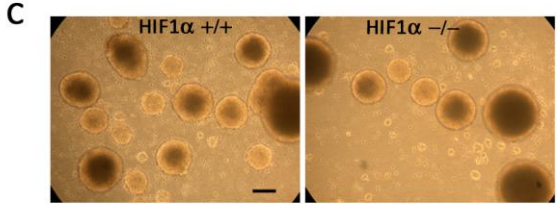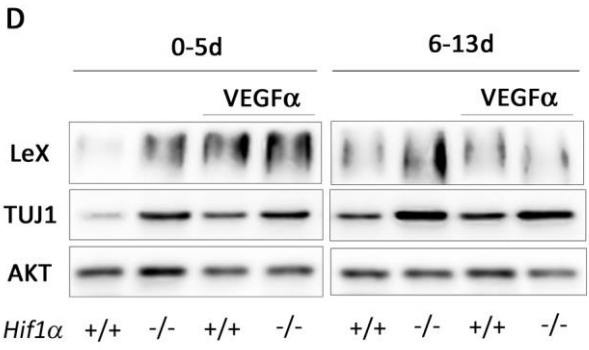

Supplement: f1 [file 8715798.f1.pdf]
